# Supplementary material
Source: Springer Nature journal article supplement (https://www.springermedizin.de/resource/supplementary/13023_2011_288_MOESM8_ESM.pdf/9642026)

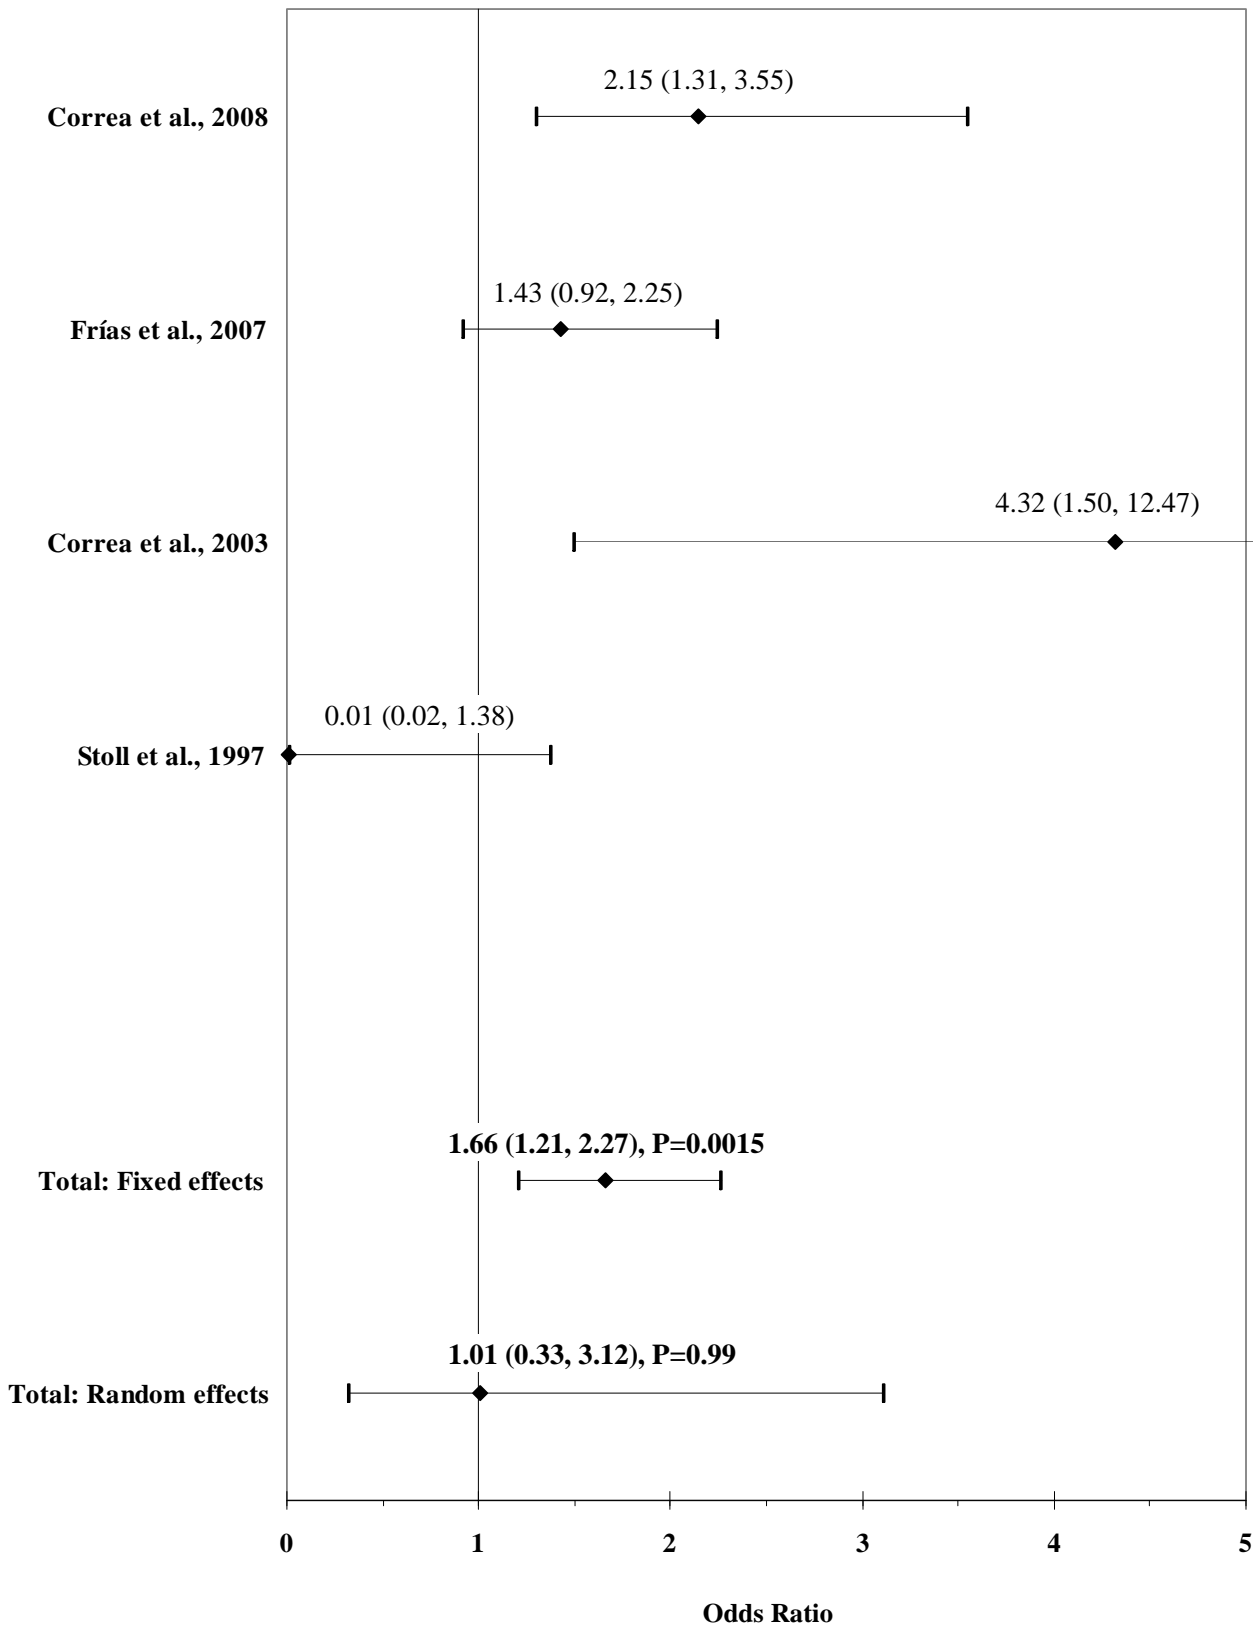

Supplement: MOESM8 [file 9642026]
